# Supplementary material for: Stabilization of Pd NPs over the surface of β-cyclodextrin incorporated UiO-66-NH2 for the C–C coupling reaction
Source: Royal Society of Chemistry journal article supplement (doi:10.1039/d2ra08347g), 2023-01-01
Supplement: d2ra08347g1.pdf [file d2ra08347g1.pdf]

## Supporting information

### Stabilization of Pd NPs over the surface of a $\beta$ -cyclodextrin incorporated UiO-66-NH<sub>2</sub> for the C-C coupling reaction

Leila Mohammadi,<sup>a</sup> Reza Taghavi,<sup>c</sup> Mojtaba Hosseinfard,<sup>b</sup> \* Mohammad Reza Vaezi,<sup>a, \*</sup>  
Sadegh Rostamnia<sup>c, \*</sup>

<sup>a</sup> Department of Nano Technology and Advanced Materials, Materials and Energy Research Center, Karaj, Iran. E-mail: [l.mohammadi3790@gmail.com](mailto:l.mohammadi3790@gmail.com), [m\\_r\\_vaezi@merc.ac.ir](mailto:m_r_vaezi@merc.ac.ir).

<sup>b</sup> Department of Energy, Materials and Energy Research Center, Karaj, Iran. E-mail: [m.hosseini@merc.ac.ir](mailto:m.hosseini@merc.ac.ir)

<sup>c</sup> Organic and Nano Group (ONG), Department of Chemistry, Iran University of Science and Technology (IUST), PO BOX 16846-13114, Tehran, Iran. E-mail: [rostamnia@iust.ac.ir](mailto:rostamnia@iust.ac.ir); [srostamnia@gmail.com](mailto:srostamnia@gmail.com)

**Table S1.** The results of the optimization studies on the Heck reaction.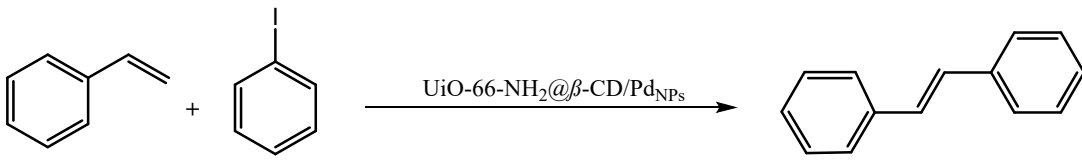

| Entry | Catalyst (mg) | Solvent                                       | T (°C) | Base                            | Time (min) | Yield (%) |
|-------|---------------|-----------------------------------------------|--------|---------------------------------|------------|-----------|
| 1     | 5             | H <sub>2</sub> O                              | 25     | K <sub>2</sub> CO <sub>3</sub>  | 240        | -         |
| 2     | 10            | H <sub>2</sub> O                              | 25     | K <sub>2</sub> CO <sub>3</sub>  | 240        | 10        |
| 3     | 20            | H <sub>2</sub> O                              | 30     | K <sub>2</sub> CO <sub>3</sub>  | 240        | 25        |
| 4     | 25            | H <sub>2</sub> O                              | 45     | K <sub>2</sub> CO <sub>3</sub>  | 240        | 35        |
| 5     | 30            | H <sub>2</sub> O                              | 55     | K <sub>2</sub> CO <sub>3</sub>  | 200        | 60        |
| 6     | 30            | H <sub>2</sub> O                              | 80     | K <sub>2</sub> CO <sub>3</sub>  | 100        | 98        |
| 7     | 30            | H <sub>2</sub> O                              | 90     | K <sub>2</sub> CO <sub>3</sub>  | 100        | 94        |
| 8     | 30            | H <sub>2</sub> O                              | 100    | K <sub>2</sub> CO <sub>3</sub>  | 100        | 90        |
| 9     | 30            | H <sub>2</sub> O                              | 80     | K <sub>2</sub> CO <sub>3</sub>  | 240        | -         |
| 10    | 30            | H <sub>2</sub> O                              | 90     | KOH                             | 240        | 76        |
| 11    | 30            | DMSO                                          | 80     | K <sub>2</sub> CO <sub>3</sub>  | 100        | 90        |
| 12    | 30            | DMAc                                          | 80     | K <sub>2</sub> CO <sub>3</sub>  | 100        | 90        |
| 13    | 30            | NMP                                           | 80     | K <sub>2</sub> CO <sub>3</sub>  | 100        | 90        |
| 14    | 30            | DMF                                           | 80     | K <sub>2</sub> CO <sub>3</sub>  | 100        | 87        |
| 15    | 30            | H <sub>2</sub> O                              | 80     | Et <sub>3</sub> N               | 100        | 87        |
| 16    | 30            | H <sub>2</sub> O                              | 80     | Na <sub>2</sub> CO <sub>3</sub> | 100        | 88        |
| 17    | 30            | H <sub>2</sub> O                              | 80     | NaOH                            | 100        | 88        |
| 18    | 30            | H <sub>2</sub> O                              | 80     | NaOAc                           | 100        | 80        |
| 19    | 30            | CH <sub>3</sub> CN                            | 80     | K <sub>2</sub> CO <sub>3</sub>  | 100        | 60        |
| 20    | 30            | C <sub>6</sub> H <sub>5</sub> CH <sub>3</sub> | 80     | K <sub>2</sub> CO <sub>3</sub>  | 100        | 65        |

Reaction condition: iodobenzene (1 mmol), styrene (1.1 mmol), base (2 mmol), solvent (3 ml)

**Table S2.** The results of the optimization studies on the Sonogashira reaction.

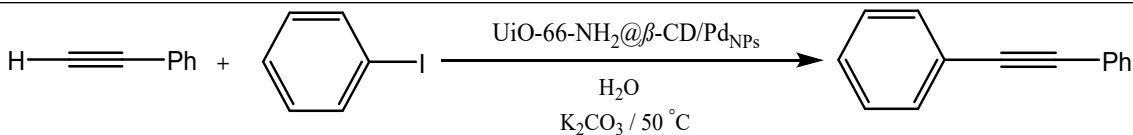

| Entry | Catalyst (mg) | Solvent          | T (°C) | Base                           | Time (h) | Yield (%) |
|-------|---------------|------------------|--------|--------------------------------|----------|-----------|
| 1     | 10            | H <sub>2</sub> O | 50     | K <sub>2</sub> CO <sub>3</sub> | 15       | 70        |
| 2     | 20            | H <sub>2</sub> O | 50     | K <sub>2</sub> CO <sub>3</sub> | 15       | 95        |
| 3     | 30            | H <sub>2</sub> O | 50     | K <sub>2</sub> CO <sub>3</sub> | 15       | 98        |
| 4     | 20            | H <sub>2</sub> O | 25     | K <sub>2</sub> CO <sub>3</sub> | 15       | 35        |
| 5     | 20            | H <sub>2</sub> O | 100    | K <sub>2</sub> CO <sub>3</sub> | 15       | 80        |
| 6     | 20            | EtOH             | 50     | K <sub>2</sub> CO <sub>3</sub> | 15       | 83        |
| 7     | 20            | H <sub>2</sub> O | 50     | NaCO <sub>3</sub>              | 15       | 15        |
| 8     | 20            | H <sub>2</sub> O | 50     | CsCO <sub>3</sub>              | 15       | 85        |
| 9     | 20            | H <sub>2</sub> O | 50     | NaOH                           | 15       | 70        |
| 10    | 20            | H <sub>2</sub> O | 50     | KOH                            | 15       | 25        |

Reaction condition: Aryl halide (1 mmol), terminal alkynes (1.2 mmol), base (2 mmol), solvent (3 mL)

**Table S3.** Preparation of various organic compounds by Heck reaction under optimum conditions.

$\text{C}_6\text{H}_5\text{CH}=\text{CH}_2 + \text{C}_6\text{H}_5\text{I} \xrightarrow[\text{2h, K}_2\text{CO}_3, 80^\circ\text{C, 30 mg}]{\text{UiO-66-NH}_2@ \beta\text{-CD/Pd}_{\text{NPs}}} \text{trans-C}_6\text{H}_5\text{CH}=\text{CHC}_6\text{H}_5$

| Entry | Alkene | Aryl halide | Product | Time (h) | Yield (%) |
|-------|--------|-------------|---------|----------|-----------|
| 1     |        |             |         | 2        | 98        |

|    |                                                                                     |                                                                                     |                                                                                      |   |    |
|----|-------------------------------------------------------------------------------------|-------------------------------------------------------------------------------------|--------------------------------------------------------------------------------------|---|----|
| 2  | 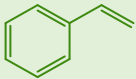   |    |    | 2 | 88 |
| 3  |    |    |    | 2 | 80 |
| 4  |    |    |    | 2 | 97 |
| 5  |    |    |    | 2 | 93 |
| 6  |   |   |   | 2 | 82 |
| 7  |  |  |  | 2 | 98 |
| 8  |  |  |  | 2 | 97 |
| 9  |  |  |  | 2 | 92 |
| 10 |  |  |  | 2 | 96 |

|    |                                                                                     |                                                                                     |                                                                                      |   |    |
|----|-------------------------------------------------------------------------------------|-------------------------------------------------------------------------------------|--------------------------------------------------------------------------------------|---|----|
| 11 | 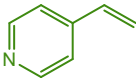   |    |    | 2 | 93 |
| 12 |    |    |    | 2 | 89 |
| 13 |    |    |    | 2 | 96 |
| 14 |    |    |    | 2 | 82 |
| 15 |   |   |   | 2 | 84 |
| 16 |  |  |  | 2 | 90 |
| 17 |  |  |  | 2 | 87 |

Reaction conditions: 1 mmol of aryl halide, 1 mmol of terminal alkyne, 2 mmol of base, 3 mL of solvent.

**Table S4.** Preparation of various organic compounds by Sonogashira reaction under optimum conditions.

| Entry                                                                              | Alkyne                                                                              | Aryl halide                                                                         | Product                                                                              | Time (min) | Yield (%) |
|------------------------------------------------------------------------------------|-------------------------------------------------------------------------------------|-------------------------------------------------------------------------------------|--------------------------------------------------------------------------------------|------------|-----------|
| 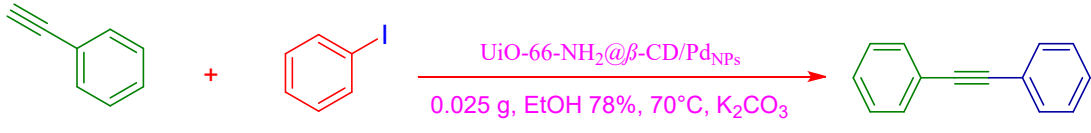 |                                                                                     |                                                                                     |                                                                                      |            |           |
| 1                                                                                  |    |    |    | 15         | 95        |
| 2                                                                                  |    |    |    | 30         | 85        |
| 3                                                                                  |    |    |    | 45         | 80        |
| 4                                                                                  |   |   |   | 75         | 98        |
| 5                                                                                  |  |  |  | 75         | 95        |
| 6                                                                                  |  |  |  | 75         | 60        |
| 7                                                                                  |  |  |  | 15         | 95        |
| 8                                                                                  |  |  |  | 45         | 80        |

|    |                                                                                     |                                                                                     |                                                                                      |    |    |
|----|-------------------------------------------------------------------------------------|-------------------------------------------------------------------------------------|--------------------------------------------------------------------------------------|----|----|
| 9  | 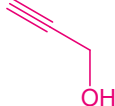   |    |    | 30 | 85 |
| 10 |    |    |    | 75 | 98 |
| 11 |    |    |    | 75 | 95 |
| 12 |    |    |    | 75 | 60 |
| 13 |   |   |    | 80 | 80 |
| 14 |  |  |  | 75 | 80 |
| 15 |  |  |  | 80 | 55 |

Reaction conditions: 1 mmol of arylhalide, 1 mmol of terminal alkyne, 2 mmol of base, 3 mL of solvent.

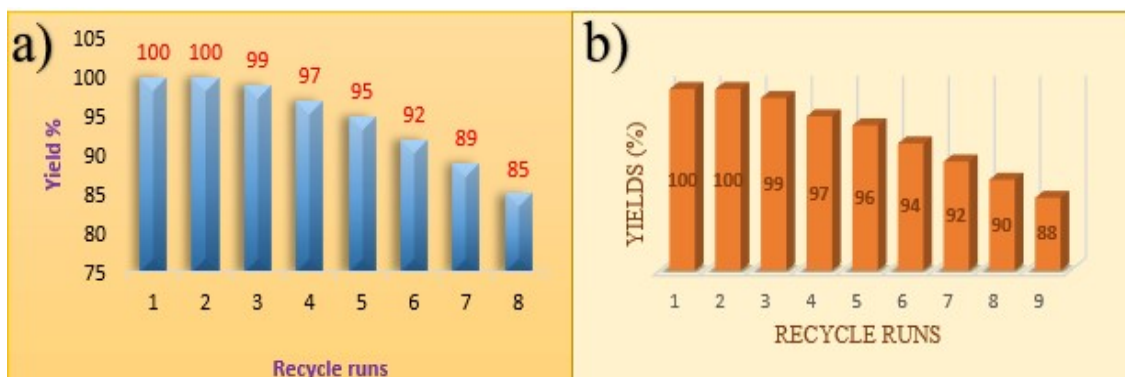

**Fig. S1.** Reusability of catalyst for a) Heck and b) Sonogashira reaction.

**Table S5:** Comparison of the catalytic performance of the proposed catalyst for Heck reaction with some related reports in the *literature*

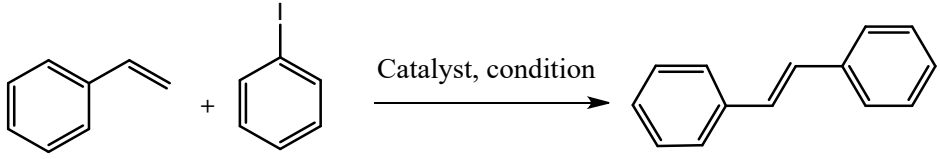

| Entry | Catalyst                                                    | Reaction condition                                                    | Time (h) | Yield (%) | Reference |
|-------|-------------------------------------------------------------|-----------------------------------------------------------------------|----------|-----------|-----------|
| 1     | GA-FSNP@Pd (0.47)                                           | DMF: H <sub>2</sub> O (2: 1), Cs <sub>2</sub> CO <sub>3</sub> , 110°C | 0.5      | 95        | [1]       |
| 2     | Pd-biomagnetic (5)                                          | DMF, TEA, 120°C                                                       | 3        | 100       | [2]       |
| 3     | Pd/N-MCNPs                                                  | DMAN, TEA, 120°C                                                      | 3        | 97.6      | [3]       |
| 4     | SBA-TMG <sup>a</sup> -Pd (0.05)                             | Solvent-free, 140°C                                                   | 4        | 90        | [4]       |
| 5     | Fe <sub>3</sub> O <sub>4</sub> @PUNP <sup>b</sup> -Pd (0.1) | H <sub>2</sub> O, K <sub>2</sub> CO <sub>3</sub> , reflux             | 12       | trace     | [5]       |
| 6     | Pd/graphene oxide (0.54)                                    | toluene, NEt <sub>3</sub> , reflux                                    | 5        | 62        | [6]       |
| 7     | Pd/MCPPY                                                    | DMA, TBA, 120°C                                                       | 3        | 97        | [7]       |
| 8     | Pd/HCN (0.255)                                              | DMF, K <sub>2</sub> CO <sub>3</sub> , 120°C                           | 1        | 100       | [8]       |
| 9     | Pd/Fe <sub>3</sub> O <sub>4</sub> @C (0.308)                | DMF, K <sub>2</sub> CO <sub>3</sub> , 120°C                           | 2        | 66        | [9]       |
| 10    | PdNs-PAMAM-g-MWCNTs (0.3)                                   | NMP, K <sub>2</sub> CO <sub>3</sub> , 100°C                           | 2.5      | 95        | [10]      |
| 11    | Pd-MNPSS (0.36)                                             | K <sub>2</sub> CO <sub>3</sub> , H <sub>2</sub> O, 100°C              | 4        | 90        | [11]      |
| 12    | PdCl <sub>2</sub> (1.5), TDTAT (3 W%)                       | K <sub>2</sub> CO <sub>3</sub> , H <sub>2</sub> O, 80°C               | 6        | 96        | [12]      |
| 13    | hydrogel@Pd NPs                                             | K <sub>2</sub> CO <sub>3</sub> , H <sub>2</sub> O, 85°C               | 0/5      | 98        | [13]      |
| 14    | <i>h</i> -BN@Sal@Pd(OAc) <sub>2</sub> (0.05 mol)            | H <sub>2</sub> O, 90°C                                                | 3.5      | 92        | [14]      |
| 15    | PdL <sub>n</sub> @β-CD (3)                                  | K <sub>2</sub> CO <sub>3</sub> , H <sub>2</sub> O, reflux             | 4        | 94        | [15]      |
| 16    | Pd-MPTA-1 (10 mg)                                           | K <sub>2</sub> CO <sub>3</sub> , H <sub>2</sub> O, 100°C              | 6        | 92        | [16]      |



|    |                                                 |                                                                |   |    |                  |
|----|-------------------------------------------------|----------------------------------------------------------------|---|----|------------------|
| 17 | Pd@CSP (0.5), TBAB                              | NEt <sub>3</sub> , H <sub>2</sub> O, reflux                    | 7 | 90 | [17]             |
| 18 | Hall/TMSPMA@PGMA@5Amin<br>otetrazole<br>@Pd NPs | K <sub>2</sub> CO <sub>3</sub> , H <sub>2</sub> O, 80°C,<br>2h | 2 | 95 | This<br>research |

## Suzuki derivatives

### 4-amine-[1,1'-biphenyl]

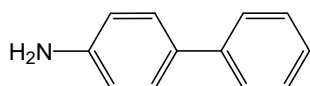

m.p. = 67-68 °C.

<sup>1</sup>HNMR (400 MHz, DMSO): δ = 5.23 (2H, NH<sub>2</sub>), 6.67 (2H, d, J = 8.3), 7.20 (1H, t, J = 7.2), 7.34-7.38 (4H, m), 7.53 (2H, d, J = 7.6). <sup>13</sup>CNMR (100 MHz, DMSO): δ = 114.3, 125.4, 125.7, 127.2 (4 × CH Ar), 127.5 (Ar), 128.8 (CH, Ar), 140.7, 148.4 (Ar). m/z: 170.1

### 4-Methoxy-1,1'-biphenyl

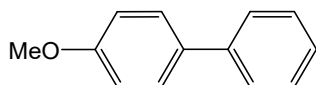

White waxy solid, yield 90%, <sup>1</sup>HNMR (500 MHz, CDCl<sub>3</sub>): 7.57-7.52 (m, 4H), 7.41 (t, J = 8.0 Hz, 2H), 7.30 (t, J = 8.0 Hz, 1H), 6.98 (d, J = 8.5 Hz, 2H), and 3.86 (s, 3H).

### 4-methyl-1,1'-biphenyl

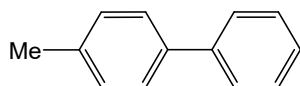

white yellow solid in 92% yield, MP: 46-48 °C; <sup>1</sup>HNMR (500 MHz, CDCl<sub>3</sub>): δ 7.61 (s, 1H), 7.51 (t, J = 7.8 Hz, 1H), 7.39 (m, 3H), 7.34 (m, 1H), 7.24 (t, J = 7.2 Hz, 1H), 7.16 (t, J = 8.1 Hz, 2H), 2.31 (s, 3H); <sup>13</sup>CNMR (126 MHz, CDCl<sub>3</sub>): δ 141.19, 139.80, 138.34, 137.05, 136.72, 129.48, 129.01, 128.74, 128.21, 127.38, 127.01, 126.83, 125.73, 21.11; FTIR (cm<sup>-1</sup>): 2918, 2318, 1743, 1521, 1325, 1114, 802; GC-MS m/z: 168.

## Biphenyl

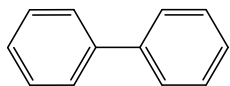

white solid in 94% yield, MP: 69-71 °C

$^1\text{H}$ NMR (500 MHz,  $\text{CDCl}_3$ ):  $\delta$  7.59 (d,  $J$  = 7.7 Hz, 4H), 7.44 (t,  $J$  = 7.7 Hz, 4H), 7.34 (t,  $J$  = 7.4 Hz, 2H);  $^{13}\text{C}$ NMR (126 MHz,  $\text{CDCl}_3$ ):  $\delta$  141.29, 128.82, 127.27; FTIR ( $\text{cm}^{-1}$ ): 2358, 1510, 1029, 580; GC-MS (EI, 70eV)  $m/z$ : found: 154 ( $\text{C}_{12}\text{H}_{10}$ ).

## Cyclohexylbenzene

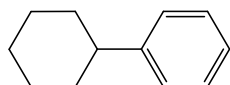

Colorless oil in 73% yield  $^1\text{H}$ NMR (400 MHz, chloroform- $d$ )  $\delta$  = 7.31 – 7.25 (m, 2H), 7.23 – 7.13 (m, 3H), 2.49 (m, 1H), 1.92 – 1.82 (m, 4H), 1.74 (m, 1H), 1.51 – 1.34 (m, 4H), 1.25 (m, 1H);  $^{13}\text{C}$ NMR (100 MHz, chloroform- $d$ )  $\delta$  = 148.2, 128.4, 127.0, 125.9, 44.8, 34.6, 27.1, 26.3.

## 4-hydroxyl-[1,1'-biphenyl]

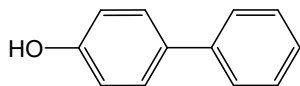

m.p. = 161-162 °C.

$^1\text{H}$ NMR (400 MHz, DMSO):  $\delta$  = 6.85 (2H, d,  $J$  = 8.5), 7.27 (1H, t,  $J$  = 7.4), 7.40 (2H, t,  $J$  = 7.4), 7.48

(2H, d,  $J$  = 8.5), 7.57 (2H, d,  $J$  = 8.5), 9.58 (1H, br s, OH).  $^{13}\text{C}$  NMR (100 MHz, DMSO):  $\delta$  = 115.8, 126.0, 126.4, 127.8, 128.8 (5  $\times$  CH, Ar), 131.0, 140.3, 157.2 (Ar).  $m/z$ : 169.1.

## 3-carboxylic acid-[1,1'-biphenyl]

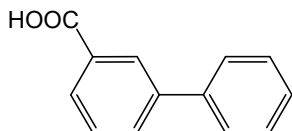

m.p. = 160-161 °C.  $^1\text{H}$ NMR (400 MHz, DMSO):  $\delta$  = 7.42 (1H, tt,  $J$  = 7.3, 1.1), 7.50 (2H, t,  $J$  = 7.3), 7.58 (1H, t,  $J$  = 7.7), 7.66 (2H, m), 7.87 (1H, dq,  $J$  = 7.7, 1.4), 8.14 (1H, dt,  $J$  = 7.7, 1.4), 8.40 (1H, t,  $J$  = 1.4).

$^{13}\text{C}$ NMR (100 MHz, DMSO):  $\delta$  = 127.2, 127.8, 128.85, 128.93, 128.96, 128.99 (CH, Ar), 129.8 (Ar), 132.4 (CH Ar), 139.9, 141.6 (2  $\times$  CH Ar), 172.3 (C=O). m/z: 197.0

## Heck derivatives

### Trans-1, 2-diphenylethene (*E*-Stilbene)

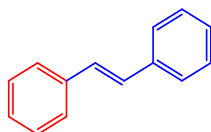

White solid, Mp. 123-124°C (lit. 123.9-124.6°C)

GC-MS (m/z): 180;  $^1\text{H}$ NMR (400 MHz,  $\text{CDCl}_3$ )  $\delta$  7.07-7.08 (s, 2H), 7.21-7.23 (m, 2H), 7.32- 7.34 (m, 4H), 7.46-7.48 (m, 2H) ppm.  $^{13}\text{C}$ NMR (100 MHz,  $\text{CDCl}_3$ )  $\delta$  122.1, 123.2, 124.3, 132.9.

### (*E*)-4-styrylbenzaldehyde

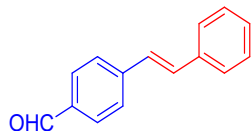

White solid, Mp. 116°C (lit. 116.0-116.8°C)

GC-MS (m/z): 208;  $^1\text{H}$ NMR (400 MHz,  $\text{CDCl}_3$ ):  $\delta$  = 9.97 (s, 1H), 7.84 (d,  $J$ =8.0 Hz, 2H), 7.62 (d,  $J$  = 8.0 Hz, 2H), 7.52 (d,  $J$ = 7.6 Hz, 2H), 7.36 (t,  $J$  = 7.6 Hz, 2H), 7.28 (t,  $J$ = 7.6 Hz, 1H), 7.22 (d,  $J$  = 5.2 Hz, 1H), 7.11 (d,  $J$ =16.4 Hz, 1H).

$^{13}\text{C}$ NMR (100 MHz,  $\text{CDCl}_3$ ):  $\delta$  = 191.5, 143.4, 136.5, 135.3, 132.2, 130.2, 128.8, 128.4, 127.3, 126.9. MS (EI) m/z: 208, 179, 165, 152, 102, 89, 76, 63, 51.

### (*E*)-4-Nitrostilbene

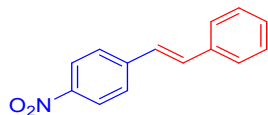

Yellow solid, Mp. 154-155°C (lit. 154.2-155.0°C)

GC-MS (m/z): 225; <sup>1</sup>HNMR (400 MHz, CDCl<sub>3</sub>) δ: 8.22 (d, *J* = 8.6 Hz, 2H, Ar-H), 7.63 (d, *J* = 8.7 Hz, 2H, Ar-H), 7.55 (d, *J* = 7.7 Hz, 2H, Ar-H), 7.40 (t, *J* = 7.6 Hz, 2H, Ar-H), 7.36-7.31 (m, 1H, Ar-H), 7.27 (d, *J* = 16.3 Hz, 1H, CH=), 7.14 (d, *J* = 16.3, 1H, Hz, CH=). <sup>13</sup>CNMR (100 MHz, CDCl<sub>3</sub>), δ = 125.2, 127.4, 128.0, 128.2, 130.0, 134.4, 137.3, 145.0, 147.8 ppm.

### **(E)-4-Styrylbenzotrile**

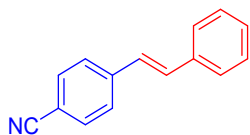

White solid, Mp. 114-115°C (lit. 114.9-115.2°C)

GC-MS (m/z): 205; <sup>1</sup>HNMR (400 MHz, CDCl<sub>3</sub>): δ 7.09 (d, 1H, *J* = 16.0 Hz), 7.22 (d, 1H, *J* = 16.0 Hz), 7.31-7.34 (t, 1H, *J* = 4.0 Hz), 7.38-7.41 (t, 2H, *J* = 4.0 Hz), 7.54 (d, 2H, *J* = 7.2 Hz), 7.58 (d, 2H, *J* = 8.4 Hz), 7.64 (d, 2H, *J* = 8.4 Hz) ppm; <sup>13</sup>CNMR (100 MHz, CDCl<sub>3</sub>), δ 111.7, 120.2, 127.8, 128.0, 128.1, 129.8, 130.0, 133.5, 133.6, 137.4, 142.9 ppm.

### **(E)-1-methoxy-4-styrylbenzene**

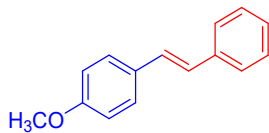

White solid, Mp. 135-136°C (lit. 135.3-135.9°C)

GC-MS (m/z): 210; <sup>1</sup>H-NMR (400 MHz, CDCl<sub>3</sub>) δ (ppm): 3.70 (3H, s), 6.78 (1H, d, *J* = 8.75 Hz), 6.90 (1H, d, *J* = 10.75 Hz), 7.00-7.38 (9H, m). <sup>13</sup>C-NMR (100 MHz, CDCl<sub>3</sub>) δ (ppm): 55.3, 114.2, 126.3, 126.6, 127.25, 127.8, 128.2, 128.7, 130.2, 137.7, 159.3.

### **(E)-1-(4-styrylphenyl) ethanone**

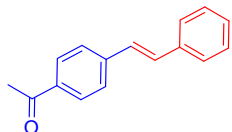

White solid, Mp. 141-142°C (lit. 141.3-142°C)

GC-MS (m/z): 222; <sup>1</sup>HNMR (400 MHz, CDCl<sub>3</sub>): δ 7.97-7.95 (d, 2H), 7.58-7.57 (d, 2H), 7.53-7.52 (d, 2H), 7.40-7.36 (t, 2H), 7.29-7.25 (t, 1H), 7.22-7.20 (d, 1H), 7.12 (d, 1H), 2.64 (s, 3H), <sup>13</sup>CNMR (100 MHz, CDCl<sub>3</sub>): δ 197.6, 142.1, 136.7, 136.1, 131.5, 128.9, 128.8, 128.4, 127.6, 126.8, 126.5, 26.8.

### (E)-Ethyl-3-styrylbenzoate

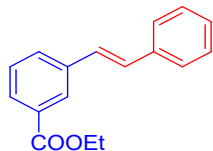

Oily liquid

GC-MS (m/z): 252; <sup>1</sup>H NMR (CDCl<sub>3</sub>, 400 MHz): δ (ppm) 8.22 (s, 1H), 7.95 (d, *J* = 7.7 Hz, 1H), 7.70 (d, *J* = 7.7 Hz, 1H), 7.55 (d, *J* = 7.4 Hz, 2H), 7.46–7.27 (m, 4H), 7.21 (d, *J* = 16.0 Hz, 1H), 7.15 (d, *J* = 16.0 Hz, 1H), 4.43 (q, *J* = 7.1 Hz, 3H), 1.44 (t, *J* = 7.1 Hz); <sup>13</sup>C NMR (CDCl<sub>3</sub>, 100 MHz): δ (ppm) 166.6, 137.7, 137.0, 131.0, 130.7, 129.9, 128.8, 128.7, 128.5, 128.0, 127.6, 127.5, 126.7.

### (E)-2-styrylthiophene

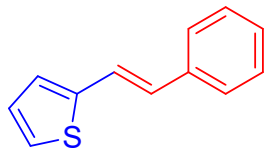

white solid, MP. 111-112°C (lit. 112°C)

GC-MS (m/z): 186; <sup>1</sup>H NMR (CDCl<sub>3</sub>, 400 MHz): δ (ppm) 7.49 (d, *J* = 7.5 Hz, 2H), 7.37 (t, *J* = 7.5 Hz, 2H), 7.28 (d, *J* = 5.1 Hz, 1H), 7.24 (d, *J* = 16 Hz, 1H), 7.21 (d, *J* = 4.9 Hz, 1H), 7.09 (d, *J* = 3.4 Hz, 1H), 7.03 (t, *J* = 4 Hz, 1H), 6.95 (d, *J* = 16.2 Hz, 1H); <sup>13</sup>C NMR (CDCl<sub>3</sub>, 100 MHz): δ (ppm) 142.9, 137.0, 128.7, 128.4, 127.6, 126.3, 126.1, 124.3, 121.8.

### References

- [1] M. Tanhaei, A. Mahjoub & R. Nejat, *Catal. Lett.* **2018**, *148*, 1549-1561.
- [2] V. S. Coker, J. A. Bennett, N. D. Telling, T. Henkel & J. M. Charnock, *Acs Nano.* **2010**, *4*, 2577-2584.

- [3] H. Yoon, S. Ko & J. Jang, *Chem. Commun.* **2007**, *14*, 1468-1470.
- [4] X. Ma, Y. Zhou, J. Zhang, A. Zhu, T. Jiang & B. Han, *Green Chem.* **2008**, *10*, 59-66.
- [5] J. Yang, D. Wang, W. Liu, X. Zhang, F. Bian & W. Yu, *Green Chem.* **2013**, *15*, 3429-3437.
- [6] Y. V. Ioni, S. E. Lyubimov, V. A. Davankov & S. P. Gubin, *Russ. J. Inorg. Chem.* **2013**, *58*, 392-394.
- [7] S. Ko & J. Jang, *Angew. Chem. Int. Ed.* **2006**, *45*, 7564-7567.
- [8] M. Zhu, Y. Wang, C. Wang, W. Li & G. Diao, *Catal. Sci. Technol.* **2013**, *3*, 952-961.
- [9] M. Zhu & G. Diao, *J. Phys. Chem. C.* **2011**, *115*, 24743-24749.
- [10] M. R. Nabid, Y. Bide & S. J. T. Rezaei, *Appl. Catal. A: Gen.* **2011**, *406*, 124-132.
- [11] M. Tukhani, F. Panahi & A. Khalafi-Nezhad, *ACS Sustain. Chem. Eng.* **2018**, *6*, 1456-1467.
- [12] N. Iranpoor, S. Rahimi & F. Panahi, *RSC Adv.* **2015**, *5*, 49559-49567.
- [13] S. Ashiri & E. Mehdipour, *RSC Adv.* **2018**, *8*, 32877-32885.
- [14] X. Cheng, W. Li, R. Nie, X. Ma, R. Sang, L. Guo & Y. Wu, *Adv. Synth. Catal.* **2017**, *359*, 454-466.
- [15] S. D. Dindulkar, D. Jeong, H. Kim & S. Jung, *Carbohydr. Res.* **2016**, *430*, 85-94.
- [16] J. Mondal, A. Modak & A. Bhaumik, *J. Mol. Catal. A. Chem.* **2011**, *350*, 40-48.
- [17] A. Kamal, V. Srinivasulu, B. N. Seshadri & N. Shankaraiah, *Green Chem.* **2012**, *14*, 2513-2522.
